# Supplementary material for: Designing and evaluating analytic-deliberative engagement processes for natural resources management
Source: Oxford University Press journal article supplement (doi:10.1525/elementa.402), 2020-01-01
Supplement: elementa-8-402-s4.pdf [file elementa-8-402-s4.pdf]

**Table S2.** Outcome from the evaluation of the strategies against the objectives by the participants in the second series of workshops.

|                            | Category of objectives <sup>a</sup> |          |        |
|----------------------------|-------------------------------------|----------|--------|
| Mitigation strategies      | Biophysical                         | Economic | Social |
| Improved forest management |                                     |          |        |
| Bioenergy                  | -                                   | +        | +      |
| Higher utilization         | +/-                                 | +/-      | +/-    |
| LLWP*                      | +/-                                 | +        | +/-    |
| Rehabilitation             | +/-                                 | +        | +      |
| Conservation-focused       |                                     |          |        |
| Old growth conservation    | +                                   | -        | +/-    |
| Reduced harvest            | +                                   | -        | -      |

<sup>a</sup> Results are presented by category of objectives, where “+” and “-” respectively indicate the highest and lowest performance. The two procedural objectives were excluded from the evaluation by workshop participants.
