# Supplementary figures and images for: Designing and evaluating analytic-deliberative engagement processes for natural resources management
Source: Oxford University Press journal article supplement (doi:10.1525/elementa.402), 2020-01-01

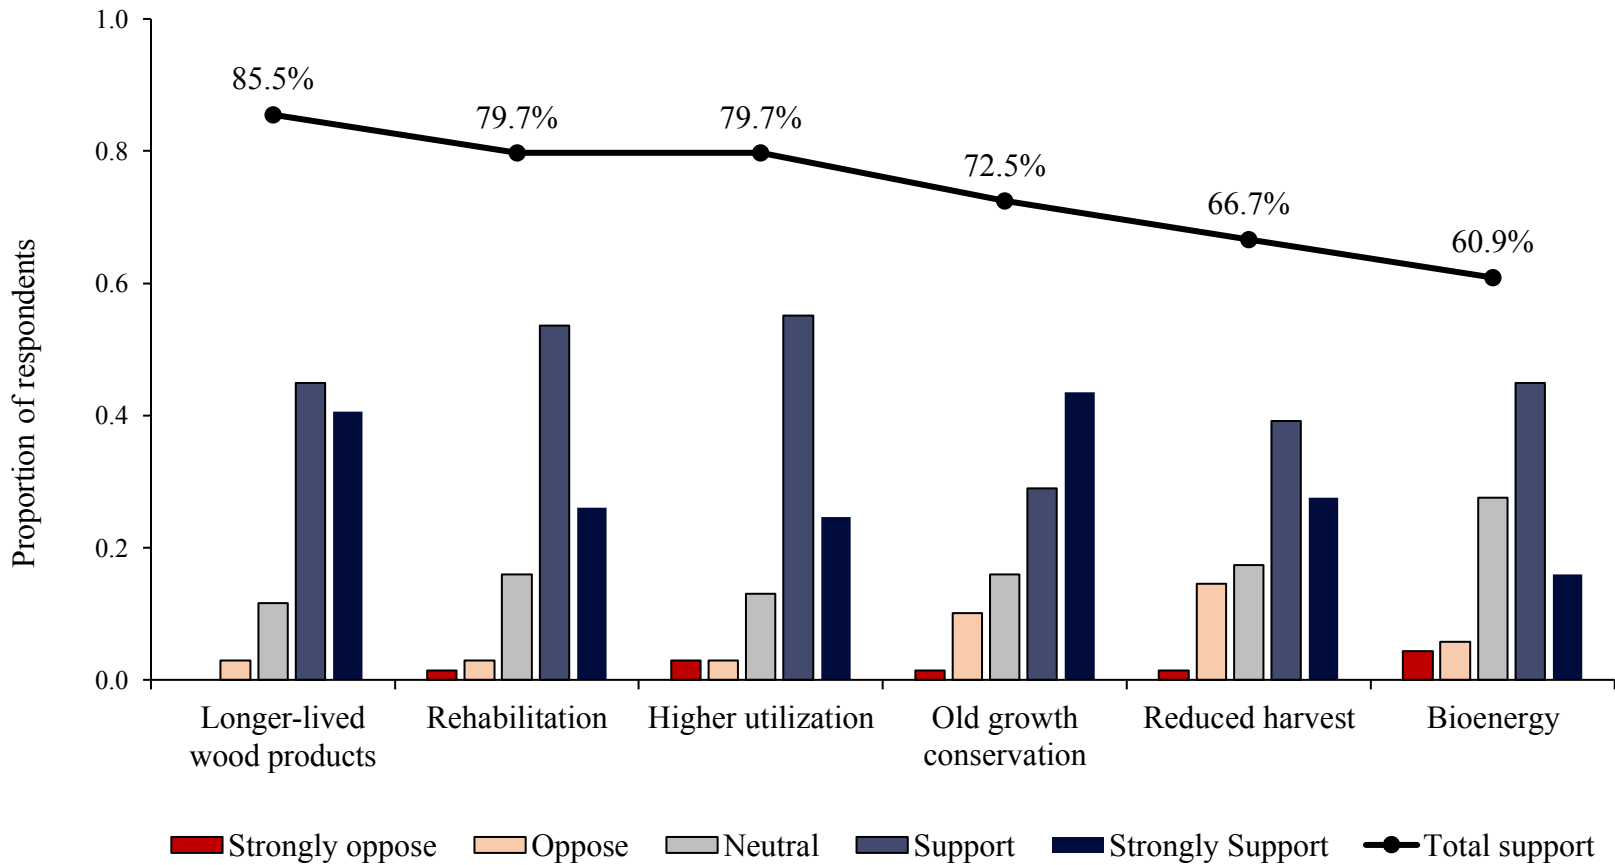

Supplement: elementa-8-402-s2.pdf [file elementa-8-402-s2.pdf]
